# Supplementary material for: Process Parameters Optimization, Characterization, and Application of KOH-Activated Norway Spruce Bark Graphitic Biochars for Efficient Azo Dye Adsorption
Source: MDPI journal article supplement (doi:10.3390/molecules27020456), 2022-01-11
Supplement: s1 [file s1]

## Supplementary data

**Table S1.** Effluents' composition

| Compounds          | Concentration (mg L <sup>-1</sup> ) |    | $\lambda_{\text{max}}$ (nm) |
|--------------------|-------------------------------------|----|-----------------------------|
|                    | A                                   | B  |                             |
| Effluent           |                                     |    |                             |
| Evans blue         | 40                                  | 80 | 607                         |
| Reactive orange 16 | 20                                  | 40 | 494                         |
| Reactive blue 4    | 20                                  | 40 | 595                         |
| Methyl Red         | 20                                  | 40 | 507                         |
| Bismarck Brown     | 20                                  | 40 | 468                         |
| Methylene Blue     | 20                                  | 40 | 668                         |
| Methyl Orange      | 20                                  | 40 | 522                         |
| Sodium Dodecyl     | 20                                  | 40 | -                           |
| Sodium sulfate     | 20                                  | 40 | -                           |
| Urea               | 10                                  | 20 | -                           |
| Ammonium chloride  | 15                                  | 30 | -                           |
| Sodium acetate     | 15                                  | 30 | -                           |

**Table S2.** XPS elemental composition of the biochar samples (atom %)

|         |      |      | O1s |             |
|---------|------|------|-----|-------------|
| Samples | C1s  | O1s  | C=O | C-OH, C-O-C |
| BC6     | 86.6 | 10.5 | 2.8 | 5.6         |
| BC4     | 87.2 | 9.1  | 2.6 | 5.0         |
| BC11    | 89.9 | 8.9  | 2.1 | 5.4         |
| BC7     | 89.4 | 9.3  | 2.4 | 5.2         |

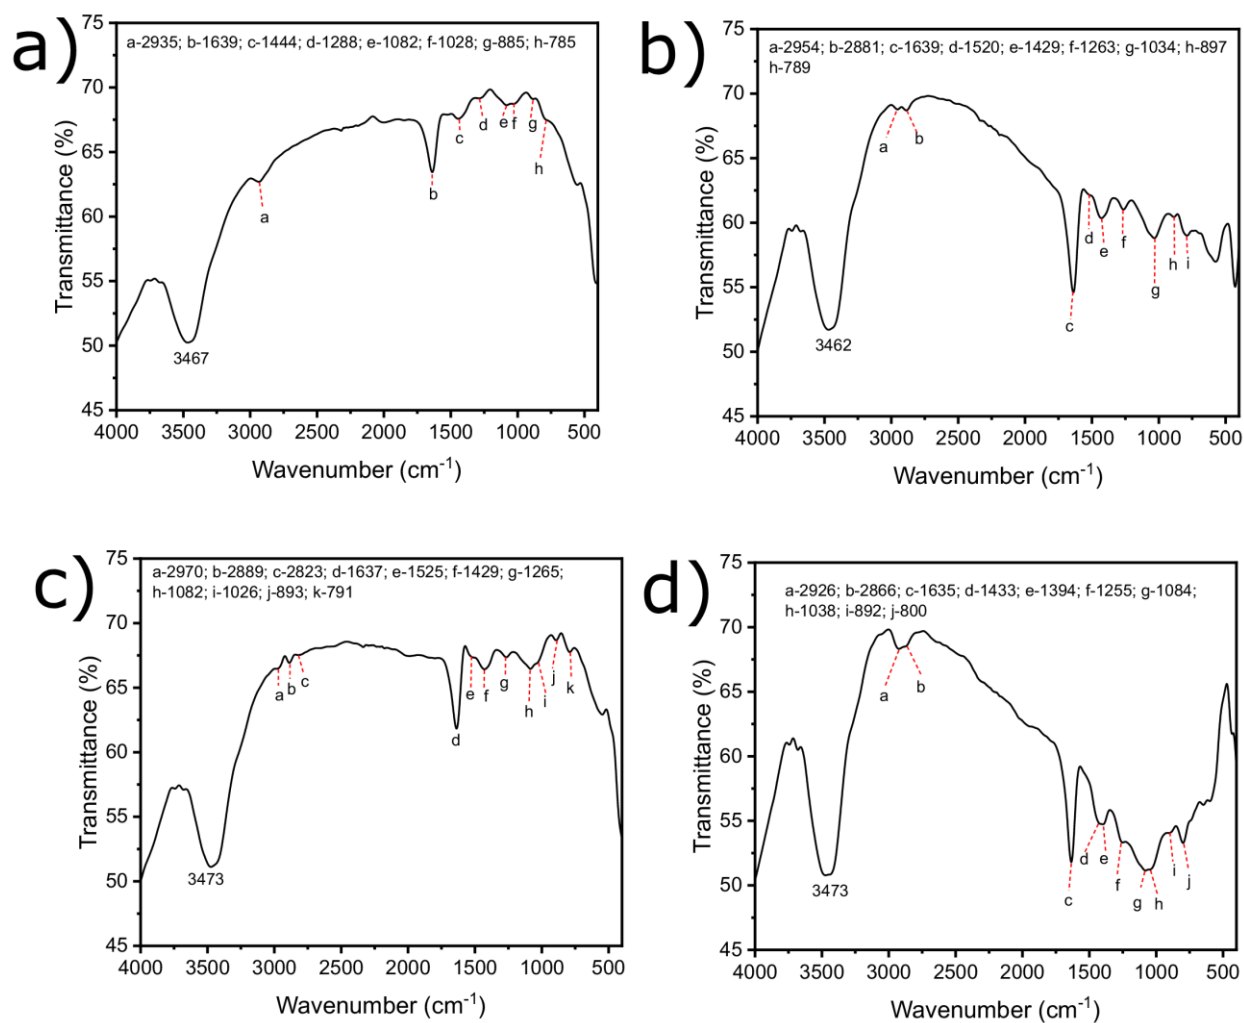

Figure s1. FTIR absorption spectra of (a) BC6, (b) BC4, (c) BC11 and (d) BC7 samples.

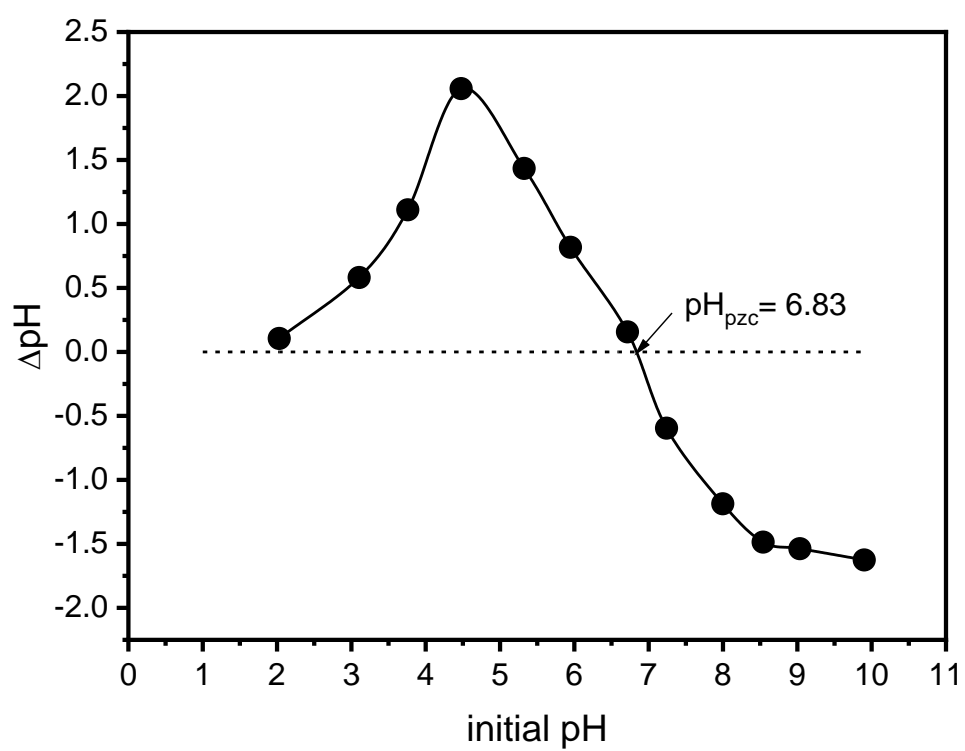

Figure S2. Point of zero charge curve of the BC6 sample.

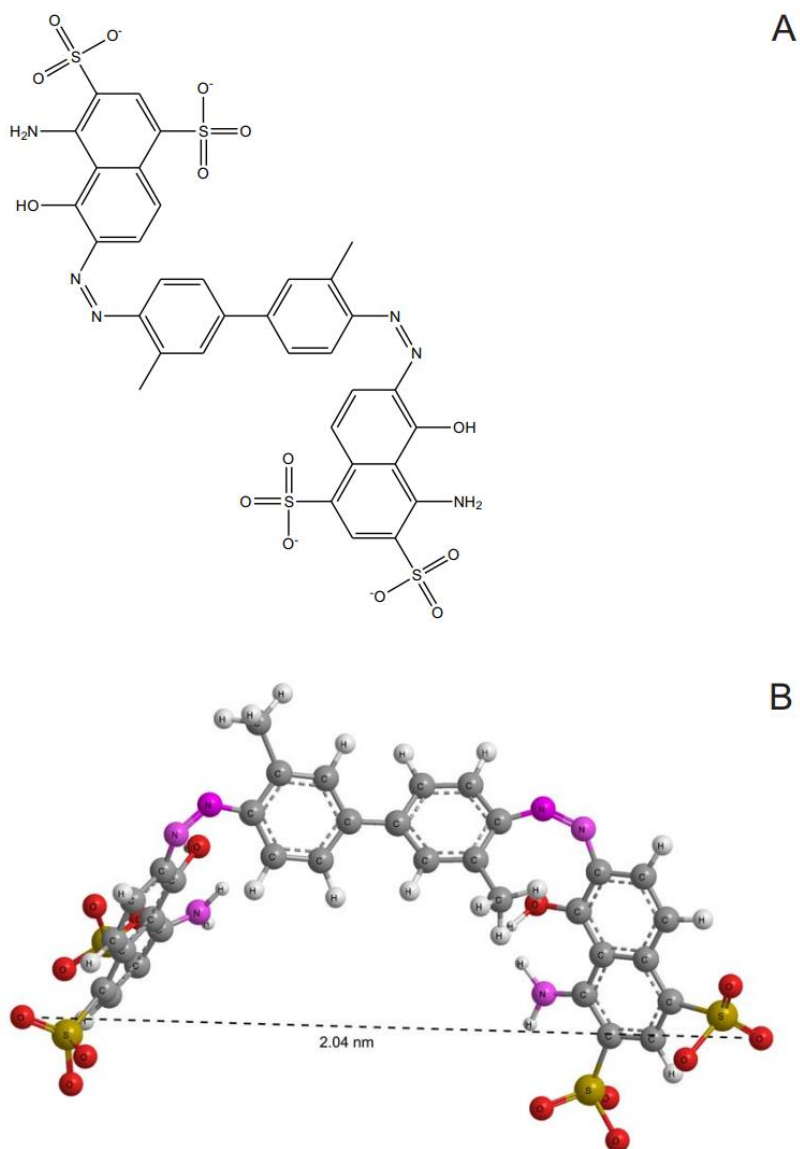

Figure S3. A- Structural formula of Evans blue dye; B- Optimized three-dimensional structural formula of DB-53. The dimensions of the chemical molecule were calculated using ChemBio 3D Ultra version 12.0.
